# Supplementary material for: In situ formation of NbOx@NbN microcomposites: seeking potential in photocatalytic and Li-ion battery applications
Source: Royal Society of Chemistry journal article supplement (doi:10.1039/c7nj03631k), 2017-12-08
Supplement: c7nj03631k1.pdf [file c7nj03631k1.pdf]

**In situ formation of NbO<sub>x</sub>/NbN microcomposite: seeking potential in  
photocatalytic and electrochemical applications**

Xiaoqing Ma, Yang Chen, Jordan Lee, Chaofan Yang, Xiaoli Cui\*

*Department of Materials Science, Fudan University, Shanghai 200433, China*

\*Corresponding author: Xiaoli Cui

E-mail address: xiaolicui@fudan.edu.cn

Tel. /Fax: +86-21-65642397

## Electronic Supplementary Information

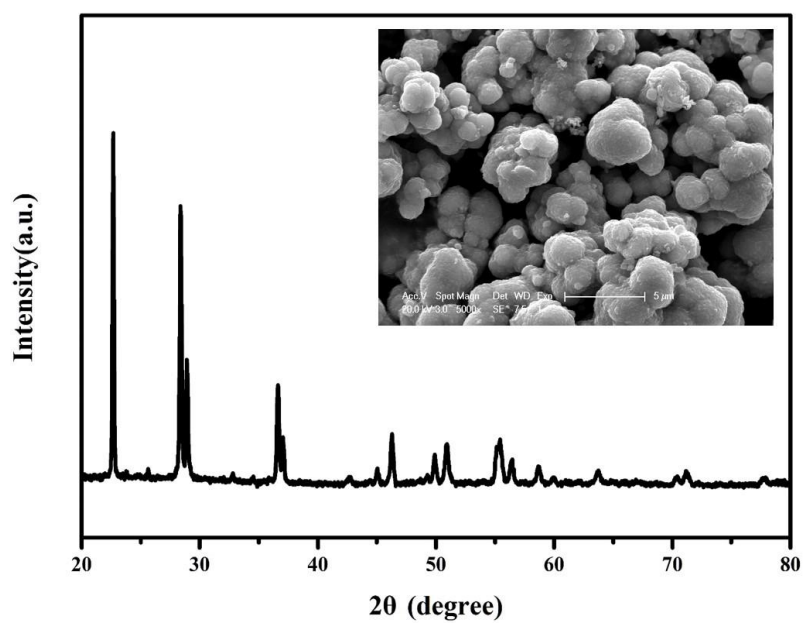

**Figure S1.** XRD patterns and SEM image of commercial Nb<sub>2</sub>O<sub>5</sub> powders.

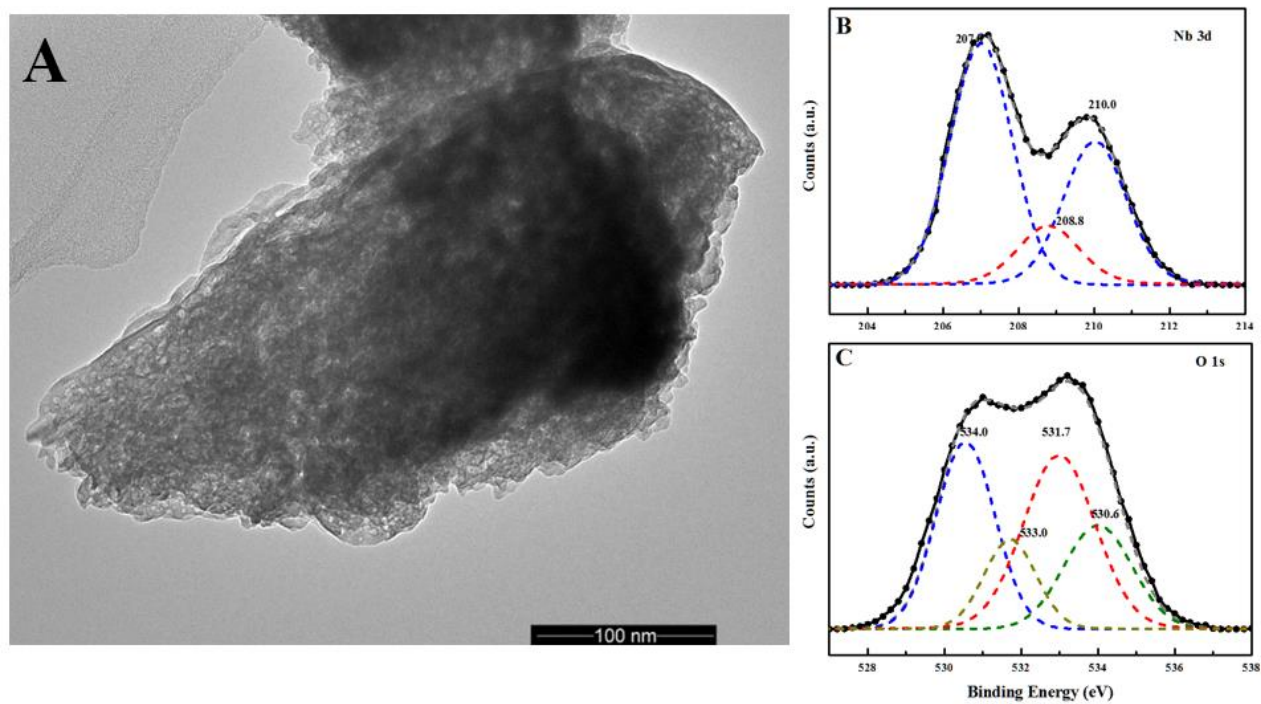

**Figure S2.** TEM and XPS results of the NbO<sub>x</sub>@NbN-3 photocatalyst after 60 hours' photoreaction in methanol solution under 500W Xe irradiation.

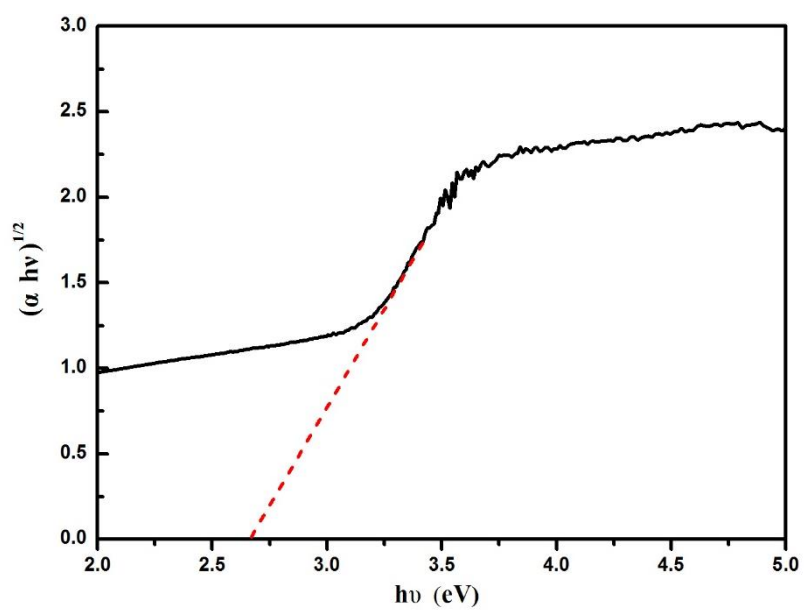

**Figure S3.** Tauc plot of  $(\alpha h\nu)^{1/2}$  versus  $h\nu$  for NbO<sub>x</sub>@NbN-3 sample.

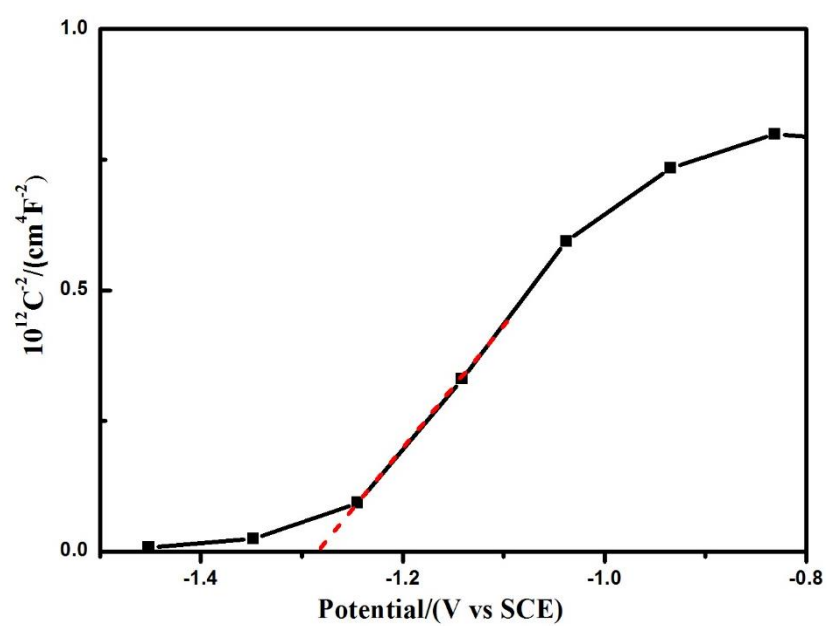

**Figure S4.** Mott-Schottky curve of NbO<sub>x</sub>@NbN-3 coated electrode.
